# Supplementary material for: Development of Stabilized Growth Factor-Loaded Hyaluronate– Collagen Dressing (HCD) matrix for impaired wound healing
Source: PubMed Central journal article supplement (PMC4818407; doi:10.1186/s40824-016-0056-4), 2016-04-01

# Supplementary figure 1

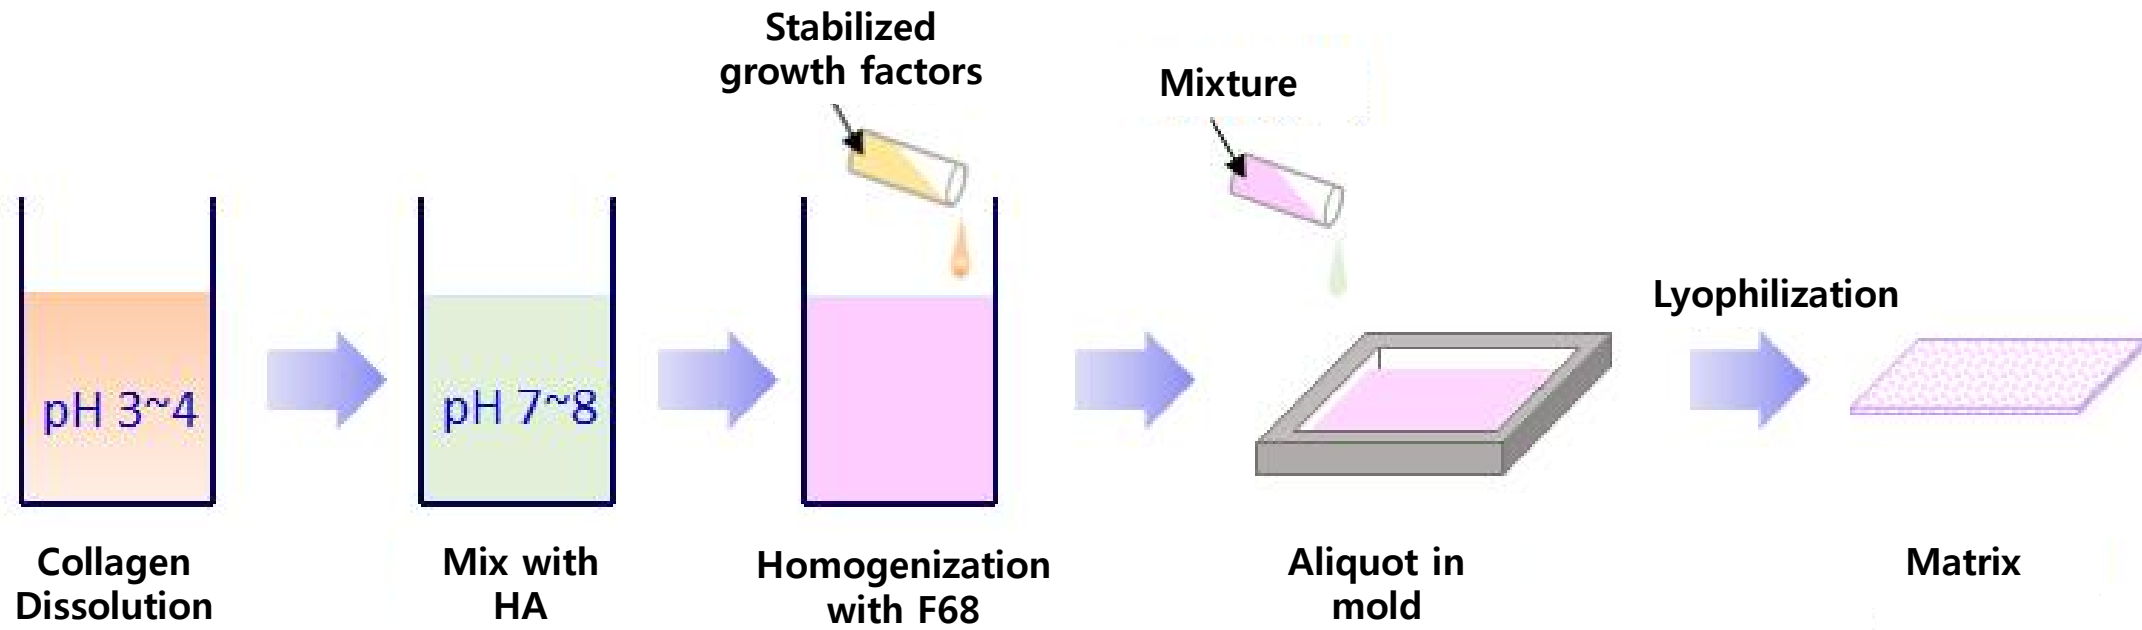

Supplement: 40824_2016_56_MOESM1_ESM.pdf [file 40824_2016_56_MOESM1_ESM.pdf]
